# Supplementary material
Source: PubMed Central journal article supplement (PMC3540898)
Supplement: Supp_Data.pdf [file Supp_Data.pdf]

## Supplementary Data

SUPPLEMENTARY TABLE S1. SUBJECT CHARACTERISTICS

|                                      | <i>Adults (n=24)</i> | <i>Children (n=9)</i> | <i>Total (n=33)</i> |
|--------------------------------------|----------------------|-----------------------|---------------------|
| Sex (F/M)                            | 14/10                | 6/3                   | 20 /13              |
| Age (years)                          | 37.5±9.1             | 14.4±2.1              | 31.2±13             |
| Body mass index (kg/m <sup>2</sup> ) | 25.7±3.6             | 20.0±2.9              | 24.2±4.3            |
| Glycated hemoglobin (%)              | 7.8±0.6              | 7.8±1.0               | 7.8±0.7             |
| Duration of diabetes (years)         | 20.6±9.7             | 5.8±3.3               | 16.5±10.7           |
| Duration on pump (years)             | 2.4±3.0              | 2.2±1.3               | 2.4±2.7             |
| Total daily insulin dose (U/day)     | 45.5±16.9            | 52.8±22.5             | 47.5±18.6           |
